# Supplementary material for: Assessment of Clinical Indicators Registered on Admission to the Hospital Related to Mortality Risk in Cancer Patients with COVID-19
Source: MDPI journal article supplement (doi:10.3390/jcm12030878), 2023-01-22
Supplement: s1 [file s1]

**Table S1. The variables affecting the risk of death in patients hospitalized due to COVID-19.** Chi-square or Mann-Whitney U test *p*-values are presented (only statistically significant variables). Effect size for numerical and categorical variables is expressed as Vargha and Delaney's A (VDA) and Odd Ratio (OR), respectively. Odd ratio is calculated for the level presented in parentheses at the variable name.

| Variable                                        | <i>p</i> | VDA/OR |
|-------------------------------------------------|----------|--------|
| <b>Patient data</b>                             |          |        |
| Age [year]                                      | <0.0001  | 0.65   |
| Sex (Man)                                       | 0.0019   | 2.06   |
| Tumor with or without metastases                | <0.0001  | na     |
| <b>Comorbidities</b>                            |          |        |
| Previous Myocardial Infarction (No)             | 0.0009   | 1.54   |
| Previous Coronary Revascularization (No)        | 0.0434   | 2.11   |
| Asthma (No)                                     | 0.0334   | 0.21   |
| Chronic Kidney Disease (No)                     | 0.0051   | 2.57   |
| Hemiplegia (No)                                 | 0.0373   | 3.22   |
| <b>Signs recorded on admission</b>              |          |        |
| SBP [mmHg]                                      | 0.0392   | 0.31   |
| Consciousness on admission                      | 0.0485   | na     |
| Wheezes/Rhonchi (No)                            | 0.0201   | 2.33   |
| <b>Medication used before hospitalization</b>   |          |        |
| LMWH (No)                                       | 0.0156   | 2.77   |
| <b>Laboratory results recorded on admission</b> |          |        |
| WBC [10 <sup>3</sup> /uL]                       | 0.0015   | 0.60   |
| Lymphocytes [10 <sup>3</sup> /uL]               | 0.0232   | 0.28   |
| Neutrophils [10 <sup>3</sup> /uL]               | 0.0001   | 0.44   |
| HGB [g/dl]                                      | 0.0036   | 0.40   |
| Potassium [mmol/l]                              | 0.0081   | 0.58   |
| CRP [mg/l]                                      | 0.007    | 0.58   |
| PCT [ng/mL]                                     | <0.0001  | 0.49   |
| INR                                             | 0.0402   | 0.51   |
| Urea [mg/dl]                                    | <0.0001  | 0.65   |
| Creatinine [mg/dl]                              | <0.0001  | 0.64   |
| eGFR [ml/min./1.73 m <sup>2</sup> ]             | 0.0002   | 0.36   |
| Bilirubin [mg/dl]                               | 0.0009   | 0.44   |
| GGTP [U/L]                                      | 0.0157   | 0.40   |

VDA—Vargha and Delaney's A, OR—Odds Ratio; SBP: systolic blood pressure; LMWH: Low-molecular-weight heparin (standard prophylactic dose 4000 IU); WBC: White blood cells; HGB: Haemoglobin; CRP: C-reactive protein; PCT: Procalcitonin; INR: International Normalized Ratio; eGFR: Estimated Glomerular Filtration Rate; GGTP: Gamma-glutamyl Transferase, na—not applicable.

**Table S2. Epidemiological and clinical characteristic of oncological patients hospitalized due to COVID-19.**

| Variable                                 | <i>n</i> | %      | Variable                         | <i>n</i> | %      |
|------------------------------------------|----------|--------|----------------------------------|----------|--------|
| Deaths up to 90 days from the admission  | 72/151   | 47.68% | <b>Symptoms and/or signs</b>     |          |        |
| Deaths up to 180 days from the admission | 81/151   | 53.64% | Respiratory support on admission | 59/151   | 39.07% |
| Number of patients transferred to ICU    | 10/151   | 6.62%  | Dyspnoea                         | 53/151   | 35.10% |
| <b>Type of cancer:</b>                   |          |        | Cough                            | 31/151   | 20.53% |
| Colon                                    | 20/151   | 13.25% | Peripheral Oedema                | 28/151   | 18.54% |
| Recorded deaths                          | 18/20    | 90.00% | Pleural effusion                 | 26/151   | 17.22% |
| Breast                                   | 17/151   | 11.26% | Coarse Rales                     | 26/151   | 17.22% |
| Recorded deaths                          | 8/17     | 47.05% | Emesis                           | 15/151   | 9.93%  |
| Lung                                     | 12/151   | 7.95%  | Abdominal Pain                   | 12/151   | 7.95%  |
| Recorded deaths                          | 10/12    | 83.33% | Diarrhoea                        | 11/151   | 7.28%  |
| Prostate                                 | 12/151   | 7.95%  | Chest Pain                       | 10/151   | 6.62%  |

|                           |        |        |                                       |         |        |
|---------------------------|--------|--------|---------------------------------------|---------|--------|
| Recorded deaths           | 6/12   | 50.00% | Hipo-anosmia                          | 2/151   | 1.32%  |
| Stomach                   | 12/151 | 7.95%  | DBP > 90 [mmHg]                       | 13/151  | 8.60%  |
| Recorded deaths           | 10/12  | 83.33% | High Heart Rate                       | 12/151  | 7.95%  |
| Pancreas                  | 10/151 | 6.62%  | Oxygen therapy on admission           | 33/151  | 21.85% |
| Recorded deaths           | 5/10   | 50.00% | SaO2 < 95% without oxygen therapy     | 45/151  | 29.80% |
| Genitourinary             | 13/151 | 8.61%  | SaO2 < 95% with oxygen therapy        | 15/151  | 9.33%  |
| Recorded deaths           | 7/13   | 53.85% | <b>Comorbidities</b>                  |         |        |
| Ovarian                   | 5/151  | 3.31%  | Hypertension                          | 83/151  | 54.97% |
| Recorded deaths           | 1/5    | 20.00% | Diabetes Mellitus                     | 39/151  | 25.83% |
| Melanoma                  | 3/151  | 1.99%  | Atrial Fibrillation                   | 21/151  | 13.91% |
| Recorded deaths           | 1/3    | 33.33% | Heart Failure                         | 23/151  | 15.23% |
| Others                    | 47/151 | 31.13% | Chronic Obstructive Pulmonary Disease | 6/151   | 3.97%  |
| Recorded deaths           | 22/47  | 46.81% | Previous Stroke                       | 8/151   | 5.30%  |
| <b>Previous therapies</b> |        |        | Smoking                               | 24/151  | 15.89% |
| ACEI or ARB               | 47/151 | 31.12% | <b>Therapy during hospitalization</b> |         |        |
| Betablockers              | 54/151 | 35.76% | Antibiotic therapy                    | 110/151 | 72.85% |
| ASA                       | 23/151 | 15.23% | Corticosteroids                       | 71/151  | 47.02% |
| Statin                    | 31/151 | 20.53% | LMWH                                  | 99/151  | 65.56% |
| Diuretic                  | 36/151 | 23.84% | Remdesivir                            | 18/151  | 11.92% |
| Oral steroid              | 8/151  | 5.30%  | Convalescent plasma                   | 13/151  | 8.61%  |
| Immunosuppressive drug    | 8/151  | 5.30%  |                                       |         |        |

ACEI: angiotensin-converting-enzyme inhibitors; ARB: angiotensin receptor blocker; ASA: acetyl-salicylic acid; LMWH: Low-molecular-weight heparin (standard prophylactic dose 4000 IU); SaO2: oxygen saturation; PLT: Platelets; AST: aspartate aminotransferase; APTT: activated partial thromboplastin time, DBP: diastolic blood pressure, Comorbidities: chronic diseases that the patient suffers from in addition to cancer, ICU: Intensive Care Unit \* Respiratory support on admission means any of the following: 1—passive oxygen therapy via oxygen sniffers, 2—straight face mask, 3—Venturi mask, 4—passive oxygen therapy via face mask with partially returnable or non-returnable reservoir bag, 5—high flow passive oxygen therapy (HFNC), 6—non-invasive ventilation (Bi-PAP/CPAP), 7—ventilator therapy (intubated or tracheostomy).

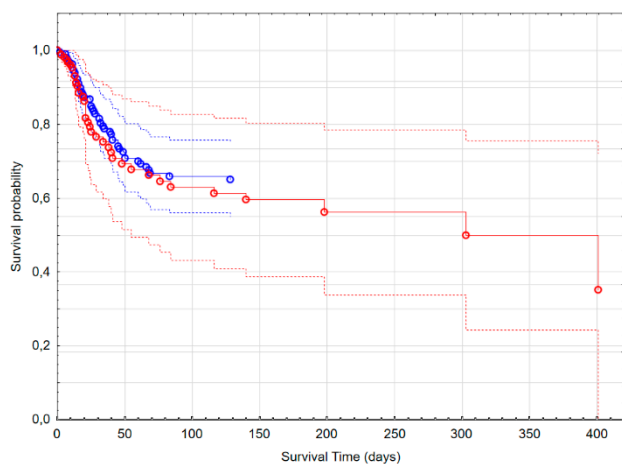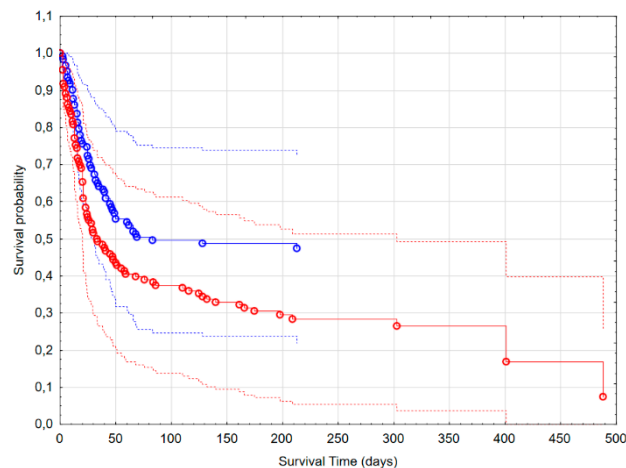

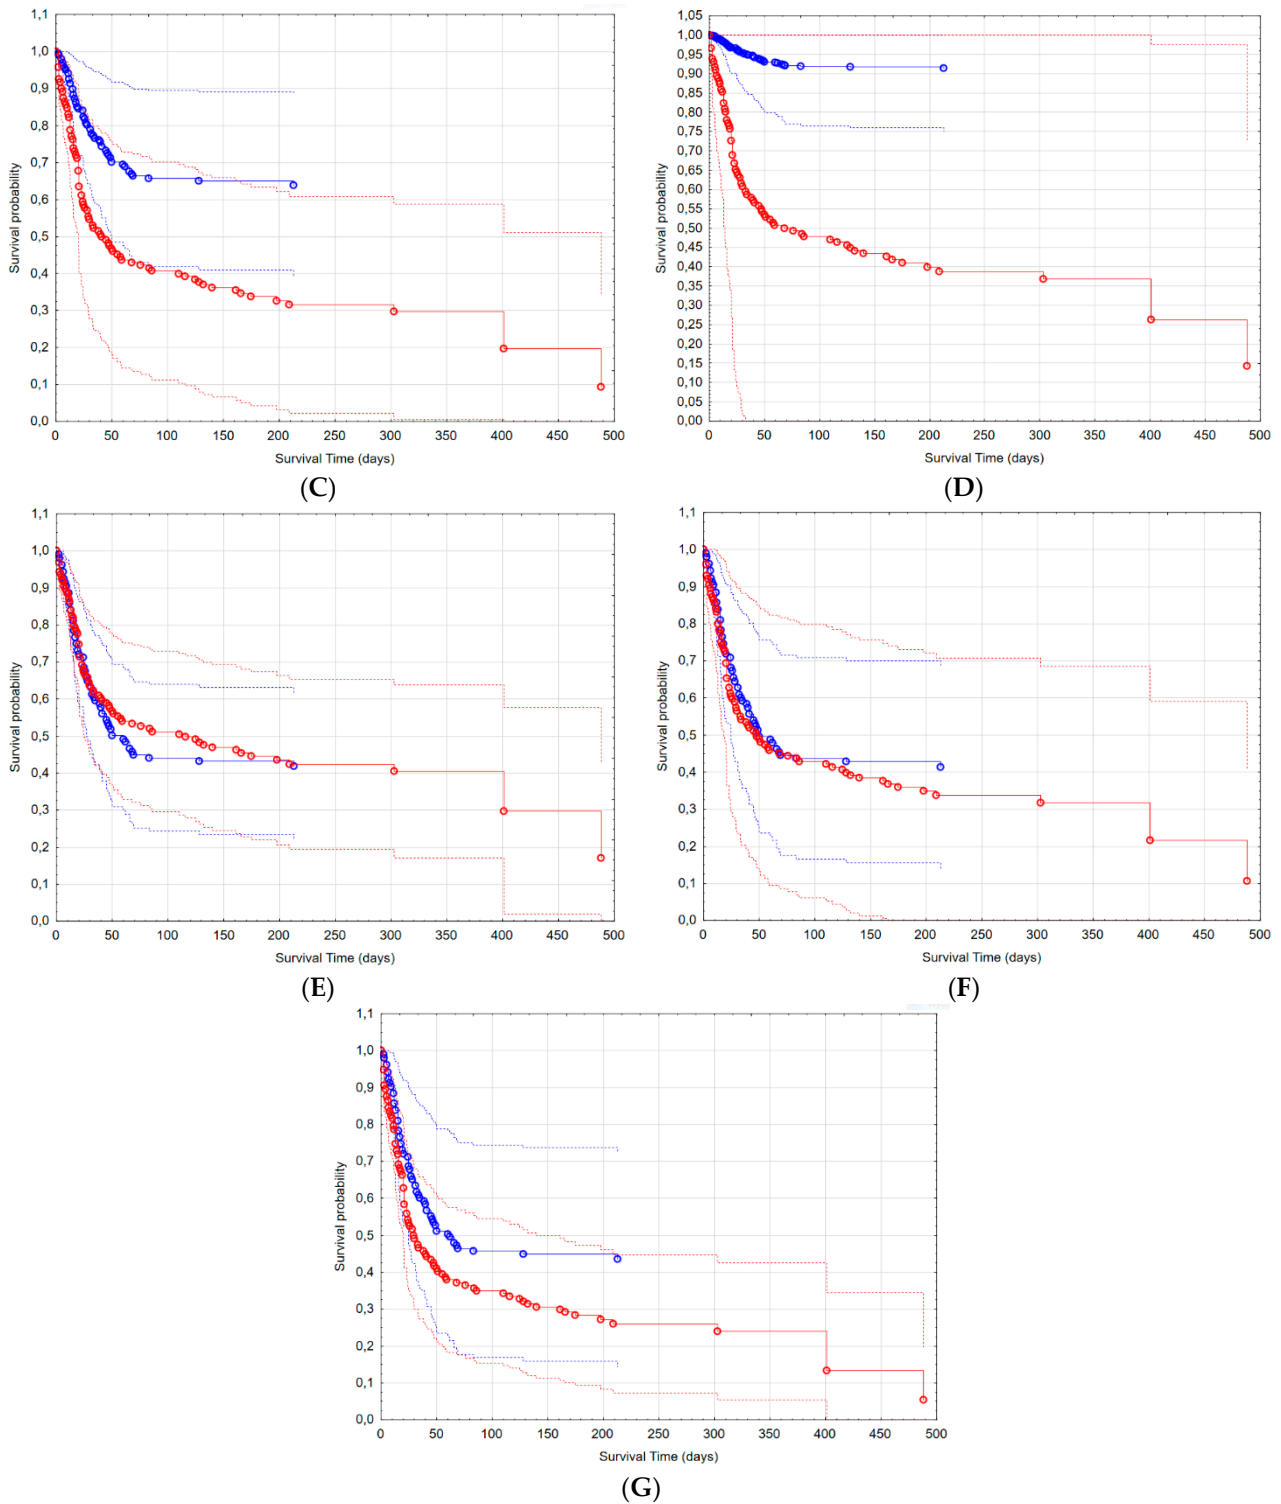

**Figure S1.** (A) Survival analysis of patients with COVID-19 and for choice values of laboratory results recorded on the admission to the hospital. Blue: patients without cancer; Red: patients with cancer. WBC [ $10^3/uL$ ] = 10; Lymphocytes [ $10^3/uL$ ] = 1.5; Neutrophils [ $10^3/uL$ ] = 7; HGB [g/dl] = 13; Potassium [mmol/L] = 4; CRP [mg/L] = 85; PCT [ng/mL] = 1.5; INR = 1.3; Urea [mg/dl] = 58; Creatinine [mg/dl] = 1.5; eGFR [ml/min./1.73 m<sup>2</sup>] = 69; Bilirubin [mg/dl] = 0.8; GGTP [U/L] = 78. (B) Survival analysis of patients with COVID-19 and previous myocardial infarction. Blue: patients without cancer; Red: patients with cancer. (C) Survival analysis of patients with COVID-19 and previous coronary revascularization. Blue: patients without cancer; Red: patients with cancer. (D) Survival analysis of patients with COVID-19 and asthma. Blue: patients without cancer; Red: patients with cancer. (E) Survival analysis of patients with COVID-19 and Chronic Kidney Disease. Blue: patients without cancer; Red: patients with cancer. (F) Survival analysis of patients with COVID-19 and hemiplegia. Blue: patients without cancer; Red: patients with cancer. (G) Survival analysis of patients with COVID-19 and previous stroke. Blue: patients without cancer; Red: patients with cancer.

with COVID-19 and Low-molecular-weight heparin (LMWH) used before hospitalization. Blue: patients without cancer; Red: patients with cancer.
